# Supplementary material
Source: publisher site journal article supplement (https://www.dovepress.com/article/567942)
Supplement: Supplementary file 1 [file 567942_Supplementary%20file.pdf]

Supplementary file 1

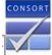

## CONSORT 2010 checklist of information to include when reporting a randomised trial\*

| Section/Topic                                        | Item No | Checklist item                                                                                                                                                                              | Reported on page No |
|------------------------------------------------------|---------|---------------------------------------------------------------------------------------------------------------------------------------------------------------------------------------------|---------------------|
| <b>Title and abstract</b>                            |         |                                                                                                                                                                                             |                     |
|                                                      | 1a      | Identification as a randomised trial in the title                                                                                                                                           | 1                   |
|                                                      | 1b      | Structured summary of trial design, methods, results, and conclusions (for specific guidance see CONSORT for abstracts)                                                                     | 1-2                 |
| <b>Introduction</b>                                  |         |                                                                                                                                                                                             |                     |
| Background and objectives                            | 2a      | Scientific background and explanation of rationale                                                                                                                                          | 3                   |
|                                                      | 2b      | Specific objectives or hypotheses                                                                                                                                                           | 3,4                 |
| <b>Methods</b>                                       |         |                                                                                                                                                                                             |                     |
| Trial design                                         | 3a      | Description of trial design (such as parallel, factorial) including allocation ratio                                                                                                        | 3                   |
|                                                      | 3b      | Important changes to methods after trial commencement (such as eligibility criteria), with reasons                                                                                          | 3                   |
| Participants                                         | 4a      | Eligibility criteria for participants                                                                                                                                                       | 3                   |
|                                                      | 4b      | Settings and locations where the data were collected                                                                                                                                        | 3                   |
| Interventions                                        | 5       | The interventions for each group with sufficient details to allow replication, including how and when they were <u>actually administered</u>                                                | 3                   |
| Outcomes                                             | 6a      | Completely defined pre-specified primary and secondary outcome measures, including how and when they were assessed                                                                          | 4                   |
|                                                      | 6b      | Any changes to trial outcomes after the trial commenced, with reasons                                                                                                                       | 3                   |
| Sample size                                          | 7a      | How sample size was determined                                                                                                                                                              | 3                   |
|                                                      | 7b      | When applicable, explanation of any interim analyses and stopping guidelines                                                                                                                | 3                   |
| Randomisation:                                       |         |                                                                                                                                                                                             |                     |
| Sequence generation                                  | 8a      | Method used to generate the random allocation sequence                                                                                                                                      | 3                   |
|                                                      | 8b      | Type of randomisation; details of any restriction (such as blocking and block size)                                                                                                         | 3                   |
| Allocation concealment mechanism                     | 9       | Mechanism used to implement the random allocation sequence (such as sequentially numbered containers), describing any steps taken to conceal the sequence until interventions were assigned | 3                   |
| Implementation                                       | 10      | Who generated the random allocation sequence, who enrolled participants, and who assigned participants to interventions                                                                     | 3                   |
| Blinding                                             | 11a     | If done, who was blinded after assignment to interventions (for example, participants, care providers, those                                                                                | 1,3                 |
|                                                      |         | assessing outcomes) and how                                                                                                                                                                 |                     |
| Statistical methods                                  | 11b     | If relevant, description of the similarity of interventions                                                                                                                                 | 3                   |
|                                                      | 12a     | Statistical methods used to compare groups for primary and secondary outcomes                                                                                                               | 4                   |
|                                                      | 12b     | Methods for additional analyses, such as subgroup analyses and adjusted analyses                                                                                                            | 4                   |
| <b>Results</b>                                       |         |                                                                                                                                                                                             |                     |
| Participant flow (a diagram is strongly recommended) | 13a     | For each group, the numbers of participants who were randomly assigned, received intended treatment, and were analysed for the primary outcome                                              | 5                   |
|                                                      | 13b     | For each group, losses and exclusions after randomisation, together with reasons                                                                                                            | 5                   |
| Recruitment                                          | 14a     | Dates defining the periods of recruitment and follow-up                                                                                                                                     | 3                   |
|                                                      | 14b     | Why the trial ended or was stopped                                                                                                                                                          | 3                   |
| Baseline data                                        | 15      | A table showing baseline demographic and clinical characteristics for each group                                                                                                            | 5                   |
| Numbers analysed                                     | 16      | For each group, number of participants (denominator) included in each analysis and whether the analysis was by original assigned groups                                                     | 4                   |
| Outcomes and estimation                              | 17a     | For each primary and secondary outcome, results for each group, and the estimated effect size and its precision (such as 95% confidence interval)                                           | 5,6                 |
|                                                      | 17b     | For binary outcomes, presentation of both absolute and relative effect sizes is recommended                                                                                                 | 4                   |
| Ancillary analyses                                   | 18      | Results of any other analyses performed, including subgroup analyses and adjusted analyses, distinguishing pre-specified from exploratory                                                   | 5                   |
| Harms                                                | 19      | All important harms or unintended effects in each group (for specific guidance see CONSORT for harms)                                                                                       | 6                   |
| <b>Discussion</b>                                    |         |                                                                                                                                                                                             |                     |
| Limitations                                          | 20      | Trial limitations, addressing sources of potential bias, imprecision, and, if relevant, multiplicity of analyses                                                                            | 6                   |
| Generalisability                                     | 21      | Generalisability (external validity, applicability) of the trial findings                                                                                                                   | 6                   |
| Interpretation                                       | 22      | Interpretation consistent with results, balancing benefits and harms, and considering other relevant evidence                                                                               | 6                   |
| <b>Other information</b>                             |         |                                                                                                                                                                                             |                     |
| Registration                                         | 23      | Registration number and name of trial registry                                                                                                                                              | 4                   |
| Protocol                                             | 24      | Where the full trial protocol can be accessed, if available                                                                                                                                 | 4                   |
| Funding                                              | 25      | Sources of funding and other support (such as supply of drugs), role of funders                                                                                                             | 7                   |

\*We strongly recommend reading this statement in conjunction with the CONSORT 2010 Explanation and Elaboration for important clarifications on all the items. If relevant, we also recommend reading CONSORT extensions for cluster randomised trials, non-inferiority and equivalence trials, non-pharmacological treatments, herbal interventions, and pragmatic trials. Additional extensions are forthcoming: for those and for [up to date](#) references relevant to this checklist, see [www.consort-statement.org](http://www.consort-statement.org).

Supplementary file 2

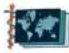

Use this section to report other relationships or activities that readers could perceive to have influenced, or that give the appearance of potentially influencing, what you wrote in the submitted work.

Section 1

Identifying Information

1. Given Name Sean 2. Surname (Last Name) McCafferty 3. Effective Date 7-8-25

4. Are you the corresponding author? Yes  No

5. Manuscript Title

Intraocular Pressure Accuracy Post-Myopic Laser in situ Keratomileusis: Pivotal Study Results, Standard vs. Modified Goldmann Tonometry

6. Manuscript Identifying Number (if you know it)

unknown

Section 2

The Work Under Consideration for Publication

Did you or your institution at any time receive payment or services from a third party for any aspect of the submitted work (including but not limited to grants, data monitoring board, study design, manuscript preparation, statistical analysis, etc...)?

Complete each row by checking "No" or providing the requested information. If you have more than one relationship click the "Add" button to add a row. Excess rows can be removed by clicking the "X" button.

| Type                                                                                                                                    | No                                  | Money Paid to You                   | Money to Your Institution*          | Name of Entity     | Comments** |
|-----------------------------------------------------------------------------------------------------------------------------------------|-------------------------------------|-------------------------------------|-------------------------------------|--------------------|------------|
| 1. Grant                                                                                                                                | <input type="checkbox"/>            | <input checked="" type="checkbox"/> | <input checked="" type="checkbox"/> | Invue technologies |            |
| 2. Consulting fee or honorarium                                                                                                         | <input checked="" type="checkbox"/> | <input type="checkbox"/>            | <input type="checkbox"/>            |                    |            |
| 3. Support for travel to meetings for the study or other purposes                                                                       | <input checked="" type="checkbox"/> | <input type="checkbox"/>            | <input type="checkbox"/>            |                    |            |
| 4. Fees for participation in review activities such as data monitoring boards, statistical analysis, end point committees, and the like | <input checked="" type="checkbox"/> | <input type="checkbox"/>            | <input checked="" type="checkbox"/> | Invue tech.        |            |

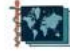

5. Payment for writing or reviewing the manuscript

6. Provision of writing assistance, medicines, equipment, or administrative support    Invue tech.

| Type     | No                                  | Money Paid to You        | Money to Your Institution*          | Name of Entity | Comments** |
|----------|-------------------------------------|--------------------------|-------------------------------------|----------------|------------|
| 7. Other | <input checked="" type="checkbox"/> | <input type="checkbox"/> | <input checked="" type="checkbox"/> |                |            |

\* This means money that your institution received for your efforts on this study.  
\*\* Use this section to provide any needed explanation.

Section 3

Relevant financial activities outside the submitted work

Place a check in the appropriate boxes in the table to indicate whether you have financial relationships (regardless of amount of compensation) with entities as described in the instructions. Use one line for each entity; add as many lines as you need by clicking the "Add" box. You should report relationships that were present during the 36 months prior to submission.

Complete each row by checking "No" or providing the requested information. If you have more than one relationship click the "Add" button to add a row. Excess rows can be removed by clicking the "X" button.

| Type of Relationship (in alphabetical order) | No                                  | Money Paid to You        | Mon. y to Yo if Institution* | Entity | Comments |
|----------------------------------------------|-------------------------------------|--------------------------|------------------------------|--------|----------|
| 1. Board membership                          | <input checked="" type="checkbox"/> | <input type="checkbox"/> | <input type="checkbox"/>     |        |          |
| 2. Consultancy                               | <input checked="" type="checkbox"/> | <input type="checkbox"/> | <input type="checkbox"/>     |        |          |
| 3. Employment                                | <input checked="" type="checkbox"/> | <input type="checkbox"/> | <input type="checkbox"/>     |        |          |
| 4. Expert testimony                          | <input checked="" type="checkbox"/> | <input type="checkbox"/> | <input type="checkbox"/>     |        |          |
| 5. Grants/grants pending                     | <input checked="" type="checkbox"/> | <input type="checkbox"/> | <input type="checkbox"/>     |        |          |

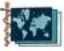

6. Payment for lectures including service on speakers bureaus    x

7. Payment for manuscript preparation    x

Relevant financial activities outside the submitted work

| Type of Relationship (in alphabetical order)                                 | No                                  | Money Paid to You                   | Money to Your Institution*          | Entity | Comments                         |                                              |
|------------------------------------------------------------------------------|-------------------------------------|-------------------------------------|-------------------------------------|--------|----------------------------------|----------------------------------------------|
| 8. Patents (planned, pending or issued)                                      | <input type="checkbox"/>            | <input type="checkbox"/>            | <input checked="" type="checkbox"/> |        | <i>Innovor technologies</i>      | <span style="float: right;">ADD<br/>x</span> |
| 9. Royalties                                                                 | <input checked="" type="checkbox"/> | <input type="checkbox"/>            | <input type="checkbox"/>            |        |                                  | <span style="float: right;">ADD<br/>x</span> |
| 10. Payment for development of educational presentations                     | <input checked="" type="checkbox"/> | <input type="checkbox"/>            | <input type="checkbox"/>            |        |                                  | <span style="float: right;">ADD<br/>x</span> |
| 11. Stock/stock options                                                      | <input checked="" type="checkbox"/> | <input type="checkbox"/>            | <input type="checkbox"/>            |        |                                  | <span style="float: right;">ADD<br/>x</span> |
| 12. Travel/accommodations/ meeting expenses unrelated to activities listed** | <input checked="" type="checkbox"/> | <input type="checkbox"/>            | <input type="checkbox"/>            |        |                                  | <span style="float: right;">ADD<br/>x</span> |
| 13. Other (err on the side of full disclosure)                               | <input checked="" type="checkbox"/> | <input checked="" type="checkbox"/> | <input checked="" type="checkbox"/> |        | <i>ownership in Innovor tech</i> | <span style="float: right;">ADD<br/>x</span> |

\* This means money that your institution received for your efforts.  
\*\* For example, if you report a consultancy above there is no need to report travel related to that consultancy on this line.

**Section 4**  
Other relationships

Are there other relationships or activities that readers could perceive to have influenced, or that give the appearance of potentially influencing, what you wrote in the submitted work?

No other relationships/conditions/circumstances that present a potential conflict of interest. Yes,  
 the following relationships/conditions/circumstances are present (explain below):

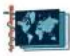

Use this section to report other relationships or activities that readers could perceive to have influenced, or that give the appearance of potentially influencing, what you wrote in the submitted work.

**Section 1**

**Identifying Information**

1. Given Name Julia 2. Surname (Last Name) Levine 3. Effective Date 7-8-25

4. Are you the corresponding author? Yes  No

5. Manuscript Title  
Intraocular Pressure Accuracy Post-Myopic Laser in situ Keratomileusis: Pivotal Study Results, Standard vs. Modified Goldman Tonometry

6. Manuscript Identifying Number (if you know it)  
unknown

**Section 2**

**The Work Under Consideration for Publication**

Did you or your institution at any time receive payment or services from a third party for any aspect of the submitted work (including but not limited to grants, data monitoring board, study design, manuscript preparation, statistical analysis, etc...)?

Complete each row by checking "No" or providing the requested information. If you have more than one relationship click the "Add" button to add a row. Excess rows can be removed by clicking the "X" button.

| Type                                                                                                                                    | No                                  | Money Paid to You        | Money to Your Institution* | Name of Entity | Comments** |
|-----------------------------------------------------------------------------------------------------------------------------------------|-------------------------------------|--------------------------|----------------------------|----------------|------------|
| 1. Grant                                                                                                                                | <input checked="" type="checkbox"/> | <input type="checkbox"/> | <input type="checkbox"/>   |                |            |
| 2. Consulting fee or honorarium                                                                                                         | <input checked="" type="checkbox"/> | <input type="checkbox"/> | <input type="checkbox"/>   |                |            |
| 3. Support for travel to meetings for the study or other purposes                                                                       | <input checked="" type="checkbox"/> | <input type="checkbox"/> | <input type="checkbox"/>   |                |            |
| 4. Fees for participation in review activities such as data monitoring boards, statistical analysis, end point committees, and the like | <input checked="" type="checkbox"/> | <input type="checkbox"/> | <input type="checkbox"/>   |                |            |

5. Payment for writing or reviewing the manuscript

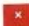

6. Provision of writing assistance, medicines, equipment, or administrative support

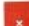

2

**The Work Under Consideration for Publication**

| Type     | No                                  | Money Paid to You        | Money to Your Institution* | Name of Entity | Comments** |     |
|----------|-------------------------------------|--------------------------|----------------------------|----------------|------------|-----|
| 7. Other | <input checked="" type="checkbox"/> | <input type="checkbox"/> | <input type="checkbox"/>   |                |            | ADD |

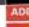

\* This means money that your institution received for your efforts on this study.  
 \*\* Use this section to provide any needed explanation.

**Section 3. Relevant financial activities outside the submitted work.**

Place a check in the appropriate boxes in the table to indicate whether you have financial relationships (regardless of amount of compensation) with entities as described in the instructions. Use one line for each entity; add as many lines as you need by clicking the "Add +" box. You should report relationships that were present during the 36 months prior to submission.

Complete each row by checking "No" or providing the requested information. If you have more than one relationship click the "Add" button to add a row. Excess rows can be removed by clicking the "X" button.

| Type of Relationship (in alphabetical order) | No                                  | Money Paid to You        | Money to Your Institution* | Entity | Comments |     |
|----------------------------------------------|-------------------------------------|--------------------------|----------------------------|--------|----------|-----|
| 1. Board membership                          | <input checked="" type="checkbox"/> | <input type="checkbox"/> | <input type="checkbox"/>   |        |          | X   |
| 2. Consultancy                               | <input checked="" type="checkbox"/> | <input type="checkbox"/> | <input type="checkbox"/>   |        |          | X   |
| 3. Employment                                | <input checked="" type="checkbox"/> | <input type="checkbox"/> | <input type="checkbox"/>   |        |          | ADD |
| 4. Expert testimony                          | <input checked="" type="checkbox"/> | <input type="checkbox"/> | <input type="checkbox"/>   |        |          | X   |
| 5. Grants/grants pending                     | <input checked="" type="checkbox"/> | <input type="checkbox"/> | <input type="checkbox"/>   |        |          | ADD |

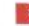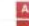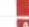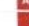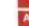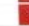

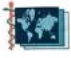

6. Payment for lectures including service on speakers bureaus

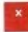

7. Payment for manuscript preparation

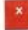

3

**Relevant financial activities outside the submitted work**

| Type of Relationship (in alphabetical order)                                 | No                                  | Money Paid to You        | Money to Your Institution* | Entity | Comments |     |
|------------------------------------------------------------------------------|-------------------------------------|--------------------------|----------------------------|--------|----------|-----|
| 8. Patents (planned, pending or issued)                                      | <input checked="" type="checkbox"/> | <input type="checkbox"/> | <input type="checkbox"/>   |        |          | ADD |
| 9. Royalties                                                                 | <input checked="" type="checkbox"/> | <input type="checkbox"/> | <input type="checkbox"/>   |        |          | ADD |
| 10. Payment for development of educational presentations                     | <input checked="" type="checkbox"/> | <input type="checkbox"/> | <input type="checkbox"/>   |        |          | ADD |
| 11. Stock/stock options                                                      | <input checked="" type="checkbox"/> | <input type="checkbox"/> | <input type="checkbox"/>   |        |          | ADD |
| 12. Travel/accommodations/ meeting expenses unrelated to activities listed** | <input checked="" type="checkbox"/> | <input type="checkbox"/> | <input type="checkbox"/>   |        |          | ADD |
| 13. Other (err on the side of full disclosure)                               | <input checked="" type="checkbox"/> | <input type="checkbox"/> | <input type="checkbox"/>   |        |          | ADD |

\* This means money that your institution received for your efforts.  
\*\* For example, if you report a consultancy above there is no need to report travel related to that consultancy on this line.

**Section 4**  
**Other relationships**

Are there other relationships or activities that readers could perceive to have influenced, or that give the appearance of potentially influencing, what you wrote in the submitted work?

- No other relationships/conditions/circumstances that present a potential conflict of interest. Yes, the following relationships/conditions/circumstances are present (explain below):

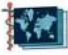

Use this section to report other relationships or activities that readers could perceive to have influenced, or that give the appearance of potentially influencing, what you wrote in the submitted work.

Section 1

Identifying Information

1. Given Name Khin 2. Surname (Last Name) Kilgore 3. Effective Date 7-8-25

4. Are you the corresponding author? Yes  No

5. Manuscript Title

Intraocular Pressure Accuracy Post-Myopic Laser In situ Keratomileusis: Pivotal Study Results, Standard vs. Modified Goldmann Tonometry

6. Manuscript Identifying Number (if you know it)

unknown

Section 2

The Work Under Consideration for Publication

Did you or your institution at any time receive payment or services from a third party for any aspect of the submitted work (including but not limited to grants, data monitoring board, study design, manuscript preparation, statistical analysis, etc...)?

Complete each row by checking "No" or providing the requested information. If you have more than one relationship click the "Add" button to add a row. Excess rows can be removed by clicking the "X" button.

| Type                                                                                                                                    | No                                  | Money Paid to You        | Money to Your Institution* | Name of Entity | Comments** |                                     |
|-----------------------------------------------------------------------------------------------------------------------------------------|-------------------------------------|--------------------------|----------------------------|----------------|------------|-------------------------------------|
| 1. Grant                                                                                                                                | <input checked="" type="checkbox"/> | <input type="checkbox"/> | <input type="checkbox"/>   |                |            | <input type="checkbox"/>            |
| 2. Consulting fee or honorarium                                                                                                         | <input checked="" type="checkbox"/> | <input type="checkbox"/> | <input type="checkbox"/>   |                |            | <input type="checkbox"/>            |
| 3. Support for travel to meetings for the study or other purposes                                                                       | <input checked="" type="checkbox"/> | <input type="checkbox"/> | <input type="checkbox"/>   |                |            | <input checked="" type="checkbox"/> |
| 4. Fees for participation in review activities such as data monitoring boards, statistical analysis, end point committees, and the like | <input checked="" type="checkbox"/> | <input type="checkbox"/> | <input type="checkbox"/>   |                |            | <input checked="" type="checkbox"/> |

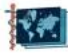

|                                                                                     |                                     |                          |                          |   |
|-------------------------------------------------------------------------------------|-------------------------------------|--------------------------|--------------------------|---|
| 5. Payment for writing or reviewing the manuscript                                  | <input checked="" type="checkbox"/> | <input type="checkbox"/> | <input type="checkbox"/> | X |
| 6. Provision of writing assistance, medicines, equipment, or administrative support | <input checked="" type="checkbox"/> | <input type="checkbox"/> | <input type="checkbox"/> | X |

| The Work Under Consideration for Publication |                                     |                          |                            |                |            |
|----------------------------------------------|-------------------------------------|--------------------------|----------------------------|----------------|------------|
| Type                                         | No                                  | Money Paid to You        | Money to Your Institution* | Name of Entity | Comments** |
| 7. Other                                     | <input checked="" type="checkbox"/> | <input type="checkbox"/> | <input type="checkbox"/>   |                |            |

\* This means money that your institution received for your efforts on this study.  
\*\* Use this section to provide any needed explanation.

**Section 3. Relevant financial activities outside the submitted work.**

Place a check in the appropriate boxes in the table to indicate whether you have financial relationships (regardless of amount of compensation) with entities as described in the instructions. Use one line for each entity; add as many lines as you need by clicking the "Add +" box. You should report relationships that were present during the 36 months prior to submission.

Complete each row by checking "No" or providing the requested information. If you have more than one relationship click the "Add" button to add a row. Excess rows can be removed by clicking the "X" button.

| Relevant financial activities outside the submitted work |                                     |                          |                          |        |          |
|----------------------------------------------------------|-------------------------------------|--------------------------|--------------------------|--------|----------|
| Type of Relationship (in alphabetical order)             | No                                  | Money Paid to You        | Money to Institution*    | Entity | Comments |
| 1. Board membership                                      | <input checked="" type="checkbox"/> | <input type="checkbox"/> | <input type="checkbox"/> |        |          |
| 2. Consultancy                                           | <input checked="" type="checkbox"/> | <input type="checkbox"/> | <input type="checkbox"/> |        |          |
| 3. Employment                                            | <input checked="" type="checkbox"/> | <input type="checkbox"/> | <input type="checkbox"/> |        |          |
| 4. Expert testimony                                      | <input checked="" type="checkbox"/> | <input type="checkbox"/> | <input type="checkbox"/> |        |          |
| 5. Grants/grants pending                                 | <input checked="" type="checkbox"/> | <input type="checkbox"/> | <input type="checkbox"/> |        |          |

6. Payment for lectures including service on speakers bureaus

x

7. Payment for manuscript preparation

x

3

| Relevant financial activities outside the submitted work                     |                                     |                          |                            |        |          |
|------------------------------------------------------------------------------|-------------------------------------|--------------------------|----------------------------|--------|----------|
| Type of Relationship (in alphabetical order)                                 | No                                  | Money Paid to You        | Money to Your Institution* | Entity | Comments |
| 8. Permits (planned, pending or issued)                                      | <input checked="" type="checkbox"/> | <input type="checkbox"/> | <input type="checkbox"/>   |        |          |
| 9. Royalties                                                                 | <input checked="" type="checkbox"/> | <input type="checkbox"/> | <input type="checkbox"/>   |        |          |
| 10. Payment for development of educational presentations                     | <input checked="" type="checkbox"/> | <input type="checkbox"/> | <input type="checkbox"/>   |        |          |
| 11. Stock/stock options                                                      | <input checked="" type="checkbox"/> | <input type="checkbox"/> | <input type="checkbox"/>   |        |          |
| 12. Travel/accommodations/ meeting expenses unrelated to activities listed** | <input checked="" type="checkbox"/> | <input type="checkbox"/> | <input type="checkbox"/>   |        |          |
| 13. Other (err on the side of full disclosure)                               | <input checked="" type="checkbox"/> | <input type="checkbox"/> | <input type="checkbox"/>   |        |          |

ADD

x

ADD

x

ADD

x

ADD

x

ADD

x

ADD

x

ADD

\* This means money that your institution received for your efforts.  
 \*\* For example, if you report a consultancy above there is no need to report travel related to that consultancy on this line.

**Section 4**

**Other relationships**

Are there other relationships or activities that readers could perceive to have influenced, or that give the appearance of potentially influencing, what you wrote in the submitted work?

- No other relationships/conditions/circumstances that present a potential conflict of interest. Yes,  
 the following relationships/conditions/circumstances are present (explain below):

Supplementary file 3



Supplementary file 4

| LASIK Cadaver Speadsheet |     |         |         | CATS    |             |              |            |             |       |         |           |       |          |           |          |       | GAT     |           |       |          |           |      |
|--------------------------|-----|---------|---------|---------|-------------|--------------|------------|-------------|-------|---------|-----------|-------|----------|-----------|----------|-------|---------|-----------|-------|----------|-----------|------|
| serial #                 | Eye | Pachy 1 | Pachy 2 | Pachy 3 | Pachy avg   | Practitioner | IOP Set mm | IOP Act. mm | IOP 1 | IOP 190 | IOP 1 avg | IOP 2 | IOP 2 90 | IOP 2 avg | IOP Act. | IOP 1 | IOP 190 | IOP 1 avg | IOP 2 | IOP 2 90 | IOP 2 avg |      |
| 22-0758 ODE              | 1   | 505     | 507     | 512     | 508         | 1            | 5          | 4.9         | 3     | 3       | 3         | 3     | 3        | 3         | 4.9      | 3     | 3       | 3         | 3     | 3        | 3         | 3    |
| 22-0758 ODE              | 1   | 505     | 507     | 512     | 508         | 2            | 5          | 5.1         | 4     | 3       | 3.5       | 3     | 4        | 3.5       | 5.1      | 3     | 3       | 2         | 3     | 3        | 3         | 3    |
| 22-0758 ODE              | 1   | 505     | 507     | 512     | 508         | 1            | 20         | 20.3        | 19    | 19      | 19        | 17    | 17       | 17        | 20.3     | 16    | 15      | 15.5      | 14    | 16       | 15        | 15   |
| 22-0758 ODE              | 1   | 505     | 507     | 512     | 508         | 2            | 20         | 21          | 22    | 22      | 22        | 20    | 19       | 19.5      | 21       | 18    | 18      | 18        | 17    | 18       | 17        | 17.5 |
| 22-0758 ODE              | 1   | 505     | 507     | 512     | 508         | 1            | 40         | 39.8        | 34    | 34      | 34        | 33    | 33       | 33        | 39.8     | 26    | 26      | 26        | 26    | 28       | 28        | 28   |
| 22-0758 ODE              | 1   | 505     | 507     | 512     | 508         | 2            | 40         | 41          | 36    | 36      | 36        | 35    | 35       | 35        | 41       | 32    | 32      | 32        | 32    | 32       | 31        | 31.5 |
| 22-0758 OSE              | 2   | 511     | 517     | 510     | 512.6666667 | 1            | 10         | 9.3         | 8     | 8       | 8         | 8     | 8        | 8         | 9.3      | 6     | 6       | 6         | 6     | 6        | 7         | 6.5  |
| 22-0758 OSE              | 2   | 511     | 517     | 510     | 512.6666667 | 2            | 10         | 10.1        | 7     | 7       | 7         | 7     | 7        | 7         | 10.1     | 6     | 6       | 6         | 6     | 6        | 7         | 6.5  |
| 22-0758 OSE              | 2   | 511     | 517     | 510     | 512.6666667 | 1            | 30         | 29.1        | 27    | 28      | 27.5      | 27    | 28       | 27.5      | 29.1     | 23    | 23      | 23        | 23    | 23       | 23        | 23   |
| 22-0758 OSE              | 2   | 511     | 517     | 510     | 512.6666667 | 2            | 30         | 28.7        | 28    | 28      | 28        | 27    | 27       | 27        | 28.7     | 21    | 21      | 21        | 21    | 21       | 21        | 21   |
| 22-0758 OSE              | 2   | 511     | 517     | 510     | 512.6666667 | 1            | 50         | 49.1        | 46    | 46      | 46        | 45    | 46       | 45.5      | 49.1     | 39    | 41      | 41        | 40    | 41       | 39        | 40   |
| 22-0758 OSE              | 2   | 511     | 517     | 510     | 512.6666667 | 2            | 50         | 49.7        | 51    | 49      | 49        | 50    | 49       | 49.5      | 49.7     | 41    | 41      | 41        | 41    | 41       | 41        | 41   |
| 22-0766 ODE              | 3   | 551     | 542     | 542     | 545         | 1            | 5          | 6           | 1     | 3       | 2         | 1     | 1        | 1         | 6        | 0     | 0       | 0         | 0     | 0        | 0         | 0    |
| 22-0766 ODE              | 3   | 551     | 542     | 542     | 545         | 2            | 5          | 6           | 2     | 2       | 2         | 2     | 2        | 2         | 6        | 0     | 0       | 0         | 0     | 0        | 0         | 0    |
| 22-0766 ODE              | 3   | 551     | 542     | 542     | 545         | 1            | 20         | 19.7        | 22    | 22      | 22        | 21    | 21.5     | 19.7      | 19       | 19    | 19      | 19        | 19    | 19       | 19        | 19   |
| 22-0766 ODE              | 3   | 551     | 542     | 542     | 545         | 2            | 20         | 20.6        | 22    | 22      | 22        | 21    | 21       | 21        | 20.6     | 18    | 17      | 17.5      | 19    | 17       | 18        | 18   |
| 22-0766 ODE              | 3   | 551     | 542     | 542     | 545         | 1            | 40         | 40.1        | 40    | 43      | 41.5      | 40    | 40       | 40        | 40.1     | 38    | 38      | 38        | 38    | 38       | 38        | 38   |
| 22-0766 ODE              | 3   | 551     | 542     | 542     | 545         | 2            | 40         | 40.9        | 40    | 40      | 40        | 39    | 39       | 39        | 40.9     | 39    | 38      | 38.5      | 36    | 38       | 37        | 37   |
| 22-0766 OSE              | 4   | 540     | 544     | 538     | 540.6666667 | 1            | 10         | 10.1        | 9     | 7       | 8         | 7     | 7        | 7         | 10.1     | 7     | 5       | 6         | 7     | 7        | 7         | 7    |
| 22-0766 OSE              | 4   | 540     | 544     | 538     | 540.6666667 | 2            | 10         | 10.1        | 5     | 5       | 5         | 5     | 5        | 5         | 10.1     | 8     | 8       | 8         | 8     | 8        | 8         | 8    |
| 22-0766 OSE              | 4   | 540     | 544     | 538     | 540.6666667 | 1            | 30         | 31.1        | 32    | 32      | 32        | 32    | 32       | 32        | 31.1     | 27    | 27      | 27        | 27    | 27       | 27        | 27   |
| 22-0766 OSE              | 4   | 540     | 544     | 538     | 540.6666667 | 2            | 30         | 31          | 34    | 34      | 34        | 34    | 34       | 34        | 31       | 28    | 28      | 28        | 25    | 26       | 25.5      | 25.5 |
| 22-0766 OSE              | 4   | 540     | 544     | 538     | 540.6666667 | 1            | 50         | 49          | 50    | 48      | 49        | 50    | 48       | 49        | 49       | 47    | 47      | 47        | 46    | 46       | 46        | 46   |
| 22-0766 OSE              | 4   | 540     | 544     | 538     | 540.6666667 | 2            | 50         | 50.4        | 52    | 52      | 52        | 49    | 49       | 49        | 50.4     | 47    | 49      | 48        | 47    | 47       | 47        | 47   |
| 1159-22                  | 5   | 505     | 515     | 509     | 509.6666667 | 1            | 5          | 4.9         | 3     | 3       | 3         | 3     | 4        | 3.5       | 4.9      | 1     | 1       | 1         | 1     | 1        | 1         | 1    |
| 1159-22                  | 5   | 505     | 515     | 509     | 509.6666667 | 2            | 5          | 4.9         | 2     | 3       | 2.5       | 3     | 3        | 3         | 4.9      | 0     | 0       | 0         | 0     | 0        | 0         | 0    |
| 1159-22                  | 5   | 505     | 515     | 509     | 509.6666667 | 1            | 20         | 20.7        | 19    | 19      | 19        | 19    | 19       | 19        | 20.7     | 17    | 17      | 17        | 17    | 16       | 16        | 16.5 |
| 1159-22                  | 5   | 505     | 515     | 509     | 509.6666667 | 2            | 20         | 20.7        | 19    | 18      | 18.5      | 18    | 18       | 18        | 20.7     | 16    | 16      | 16        | 16    | 16       | 16        | 16   |
| 1159-23                  | 5   | 505     | 515     | 509     | 509.6666667 | 1            | 40         | 40.4        | 37    | 37      | 37        | 36    | 37       | 36.5      | 40.4     | 32    | 34      | 33        | 32    | 32       | 32        | 32   |
| 1159-24                  | 5   | 505     | 515     | 509     | 509.6666667 | 2            | 40         | 40.4        | 36    | 36      | 36        | 34    | 36       | 35        | 40.4     | 31    | 31      | 31        | 31    | 34       | 32        | 33   |
| 1160-22                  | 6   | 519     | 528     | 520     | 522.3333333 | 1            | 10         | 9.3         | 7     | 7       | 7         | 6     | 7        | 6.5       | 9.3      | 3     | 3       | 3         | 3     | 3        | 3         | 3    |
| 1160-22                  | 6   | 519     | 528     | 520     | 522.3333333 | 2            | 10         | 8.4         | 3     | 3       | 3         | 3     | 4        | 3.5       | 8.4      | 2     | 2       | 2         | 2     | 2        | 2         | 2    |
| 1160-22                  | 6   | 519     | 528     | 520     | 522.3333333 | 1            | 30         | 30.5        | 27    | 27      | 27        | 27    | 27       | 27        | 30.5     | 22    | 20      | 21        | 21    | 22       | 21.5      | 21.5 |
| 1160-22                  | 6   | 519     | 528     | 520     | 522.3333333 | 2            | 30         | 30.1        | 23    | 24      | 23.5      | 24    | 24       | 24        | 30.1     | 18    | 19      | 18.5      | 20    | 20       | 20        | 20   |
| 1160-23                  | 6   | 519     | 528     | 520     | 522.3333333 | 1            | 50         | 49.7        | 42    | 41      | 41.5      | 41    | 42       | 41.5      | 49.7     | 38    | 38      | 38        | 38    | 38       | 38        | 38   |
| 1160-24                  | 6   | 519     | 528     | 520     | 522.3333333 | 2            | 50         | 49.3        | 43    | 43      | 43        | 43    | 43       | 43        | 49.3     | 38    | 38      | 38        | 39    | 39       | 39        | 39   |
| 22-0845 ODE              | 7   | 545     | 550     | 541     | 545.3333333 | 1            | 5          | 4.7         | 4     | 5       | 4.5       | 4     | 5        | 4.5       | 4.7      | 2     | 2       | 2         | 2     | 2        | 2         | 2    |
| 22-0845 ODE              | 7   | 545     | 550     | 541     | 545.3333333 | 2            | 5          | 4.7         | 5     | 5       | 5         | 5     | 5        | 5         | 4.7      | 3     | 3       | 3         | 3     | 3        | 2.5       | 2.5  |
| 22-0845 ODE              | 7   | 545     | 550     | 541     | 545.3333333 | 1            | 20         | 20.1        | 19    | 19      | 19        | 19    | 17       | 18        | 20.1     | 13    | 13      | 13        | 12    | 12       | 12        | 12   |
| 22-0845 ODE              | 7   | 545     | 550     | 541     | 545.3333333 | 2            | 20         | 20.4        | 19    | 19      | 19        | 15    | 15       | 15        | 20.4     | 12    | 12      | 12        | 12    | 12       | 12        | 12   |
| 22-0845 ODE              | 7   | 545     | 550     | 541     | 545.3333333 | 1            | 40         | 40.7        | 34    | 33      | 33.5      | 33    | 33       | 33        | 40.7     | 35    | 34      | 34.5      | 33    | 34       | 34        | 33.5 |
| 22-0845 ODE              | 7   | 545     | 550     | 541     | 545.3333333 | 2            | 40         | 40.7        | 40    | 40      | 40        | 40    | 40       | 40        | 40.7     | 42    | 42      | 42        | 42    | 42       | 42        | 42   |
| 22-0845 OSE              | 8   | 549     | 546     | 549     | 548         | 1            | 10         | 8           | 4     | 4       | 4         | 4     | 5        | 5         | 8        | 2     | 2       | 2         | 2     | 2        | 2         | 2    |
| 22-0845 OSE              | 8   | 549     | 546     | 549     | 548         | 2            | 10         | 10.1        | 11    | 10      | 10.5      | 11    | 10       | 10.5      | 10.1     | 2     | 2       | 2         | 2     | 2        | 2         | 2    |
| 22-0845 OSE              | 8   | 549     | 546     | 549     | 548         | 1            | 30         | 29.3        | 23    | 24      | 23.5      | 23    | 24       | 23.5      | 29.3     | 20    | 20      | 20        | 21    | 21       | 21        | 21   |
| 22-0845 OSE              | 8   | 549     | 546     | 549     | 548         | 2            | 30         | 29.2        | 20    | 22      | 21        | 20    | 21       | 20.5      | 29.2     | 20    | 19      | 19.5      | 20    | 19       | 19.5      | 19.5 |
| 22-0845 OSE              | 8   | 549     | 546     | 549     | 548         | 1            | 50         | 48          | 43    | 40      | 41.5      | 43    | 40       | 41.5      | 48       | 40    | 38      | 39        | 40    | 38       | 39        | 39   |
| 22-0845 OSE              | 8   | 549     | 546     | 549     | 548         | 2            | 50         | 49          | 44    | 44      | 44        | 44    | 44       | 44        | 49       | 40    | 41      | 40.5      | 40    | 40       | 40        | 40   |
| 22-1015 OSE              | 9   | 548     | 560     | 561     | 556.3333333 | 1            | 5          | 4.9         | 4     | 4       | 4         | 4     | 4        | 4         | 4.9      | 1     | 1       | 1         | 1     | 1        | 1         | 1    |
| 22-1015 OSE              | 9   | 548     | 560     | 561     | 556.3333333 | 2            | 5          | 4.7         | 4     | 4       | 4         | 4     | 4        | 4         | 4.7      | 0     | 0       | 0         | 0     | 0        | 0         | 0    |
| 22-1015 OSE              | 9   | 548     | 560     | 561     | 556.3333333 | 1            | 20         | 20.5        | 20    | 20      | 20        | 20    | 20       | 20        | 20.5     | 15    | 15      | 15        | 15    | 15       | 15        | 15   |
| 22-1015 OSE              | 9   | 548     | 560     | 561     | 556.3333333 | 2            | 20         | 20.5        | 21    | 22      | 21.5      | 21    | 21       | 21        | 20.5     | 15    | 15      | 15        | 15    | 15       | 15        | 15   |
| 22-1015 OSE              | 9   | 548     | 560     | 561     | 556.3333333 | 1            | 40         | 39.7        | 38    | 38      | 38        | 38    | 38       | 38        | 39.7     | 30    | 30      | 31        | 30    | 31       | 30        | 30.5 |
| 22-1015 OSE              | 9   | 548     | 560     | 561     | 556.3333333 | 2            | 40         | 38.9        | 38    | 37      | 37.5      | 38    | 38       | 38        | 38.9     | 29    | 28      | 28.5      | 29    | 28       | 28.5      | 28.5 |
| 22-1015 ODE              | 10  | 555     | 562     | 562     | 559.6666667 | 1            | 10         | 10.6        | 10    | 10      | 10        | 10    | 10       | 10        | 10.6     | 7     | 7       | 7         | 7     | 7        | 7         | 7    |
| 22-1015 ODE              | 10  | 555     | 562     | 562     | 559.6666667 | 2            | 10         | 10.5        | 12    | 12      | 12        | 12    | 11       | 11.5      | 10.5     | 6     | 6       | 6         | 6     | 6        | 6         | 6    |
| 22-1015 ODE              | 10  | 555     | 562     | 562     | 559.6666667 | 1            | 30         | 29.5        | 27    | 27      | 27        | 27    | 26       | 26.5      | 29.5     | 23    | 23      | 23        | 22    | 22       | 22        | 22   |
| 22-1015 ODE              | 10  | 555     | 562     | 562     | 559.6666667 | 2            | 30         | 28.9        | 28    | 28      | 28        | 28    | 28       | 28        | 28.9     | 22    | 21      | 21.5      | 22    | 21       | 21.5      | 21.5 |
| 22-1015 ODE              | 10  | 555     | 562     | 562     | 559.6666667 | 1            | 50         | 50.2        | 46    | 47      | 46.5      | 46    | 47       | 46.5      | 50.2     | 42    | 42      | 42        | 40    | 40       | 40        | 40   |
| 22-1015 ODE              | 10  | 555     | 562     | 562     | 559.6666667 | 2            | 50         | 50          | 46    | 47      | 46.5      | 47    | 47       | 47        | 50       | 40    | 40      | 40        | 41    | 41       | 41        | 41   |
| A-22-3902-W OD           | 11  | 575     | 575     | 575     | 575         | 1            | 5          | 5.2         | 4     | 4       | 4         | 3     | 3        | 3         | 5.2      | 2     | 2       | 2         | 2     | 1        | 1         | 1    |
| A-22-3902-W OD           | 11  | 575     | 575     | 575     | 575         | 2            | 5          | 5.5         | 3     | 3       | 3         | 3     | 3        | 3         | 5.5      | 1     | 1       | 1         | 1     | 2        | 2         | 2    |
| A-22-3902-W OD           | 11  | 575     | 575     | 575     | 575         | 1            | 20         | 20.7        | 20    | 20      | 20        | 20    | 20       | 20        | 20.7     | 15    | 15      | 15        | 15    | 15       | 15        | 15   |
| A-22-3902-W OD           | 11  | 575     | 575     | 575     | 575         | 2            | 20         | 20.7        | 21    | 21      | 21        | 21    | 21       | 21        | 20.7     | 17    | 17      | 17        | 17    | 17       | 17        | 17   |
| A-22-3902-W OD           | 11  | 575     | 575     | 575     | 575         | 1            | 40         | 40.1        | 39    | 39      | 39        | 39    | 39       | 39        | 40.1     | 37    | 37      | 37        | 37    | 37       | 37        | 37   |
| A-22-3902-W OD           | 11  | 575     | 575     | 575     | 575         | 2            | 40         | 39.3        | 41    | 41      | 41        | 41    | 41       | 41        | 39.3     | 38    | 39      | 38.5      | 39    | 39       | 39        | 39   |
| A-22-3902-W OS           | 12  | 567     | 569     | 566     | 567.3333333 | 1            | 10         | 12.9        | 12    | 12      | 12        | 12    | 12       | 12        | 12.9     | 10    | 10      |           |       |          |           |      |
